# Supplementary material
Source: MDPI journal article supplement (https://www.mdpi.com/2304-6740/11/8/325)
Supplement: s1 [file s1]

## Supporting information

# Study of the Cathode Pt-Electrocatalysts Based on Reduced Graphene Oxide with Pt-SnO<sub>2</sub> Hetero-Clusters

Dmitry D. Spasov <sup>1,2,\*</sup>, Nataliya A. Ivanova <sup>1</sup>, Ruslan M. Mensharapov <sup>1</sup>, Matvey V. Sinyakov <sup>1,3</sup>,  
Adelina A. Zasyapkina <sup>1</sup>, Elena V. Kukueva <sup>1</sup>, Alexander L. Trigub <sup>1</sup>, Elizaveta S. Kulikova <sup>1</sup>  
and Vladimir N. Fateev <sup>1</sup>

<sup>1</sup> National Research Center “Kurchatov Institute”, 1, Akademika Kurchatova Sq., 123182 Moscow, Russia; ivanovana.1989@outlook.com (N.A.I.); mensharapov\_rm@nrcki.ru (R.M.M.); mmatveimatvei4@gmail.com (M.V.S.); zasyapkina\_aa@nrcki.ru (A.A.Z.); elena.kukueva@gmail.com (E.V.K.); alexander.trigub@gmail.com (A.L.T.); lizchkakul@mail.ru (E.S.K.); vladimirfateev2@yandex.ru (V.N.F.)

<sup>2</sup> Department of Chemistry and Electrochemical Energy, National Research University “Moscow Power Engineering Institute”, 14, Krasnokazarmennaya St., 111250 Moscow, Russia

<sup>3</sup> Institute of Modern Energetics and Nanotechnology, D. Mendeleev University of Chemical Technology of Russia, 9, Miusskaya Square, 125047 Moscow, Russia

\* Correspondence: spasovdd@outlook.com

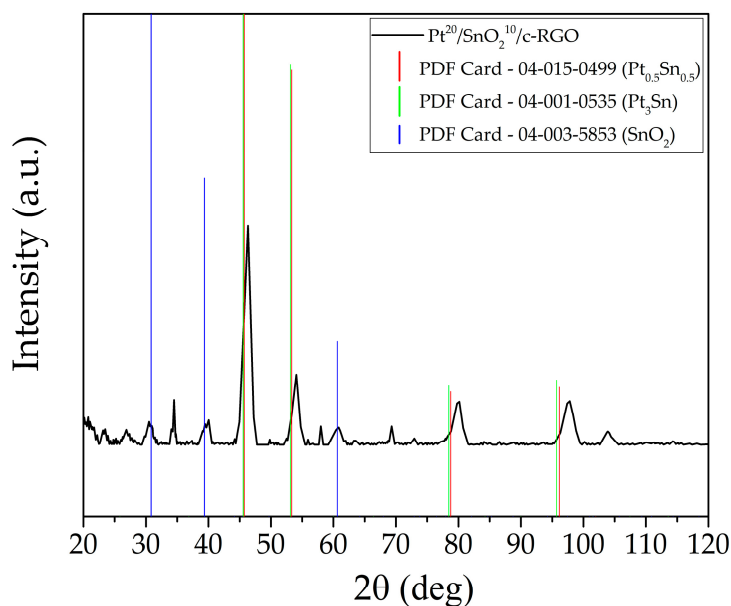

**Figure S1.** XRD pattern of Pt<sup>20</sup>/SnO<sub>2</sub><sup>10</sup>/c-RGO and PDF card (Pt<sub>0.5</sub>Sn<sub>0.5</sub>, Pt<sub>3</sub>Sn, SnO<sub>2</sub>).

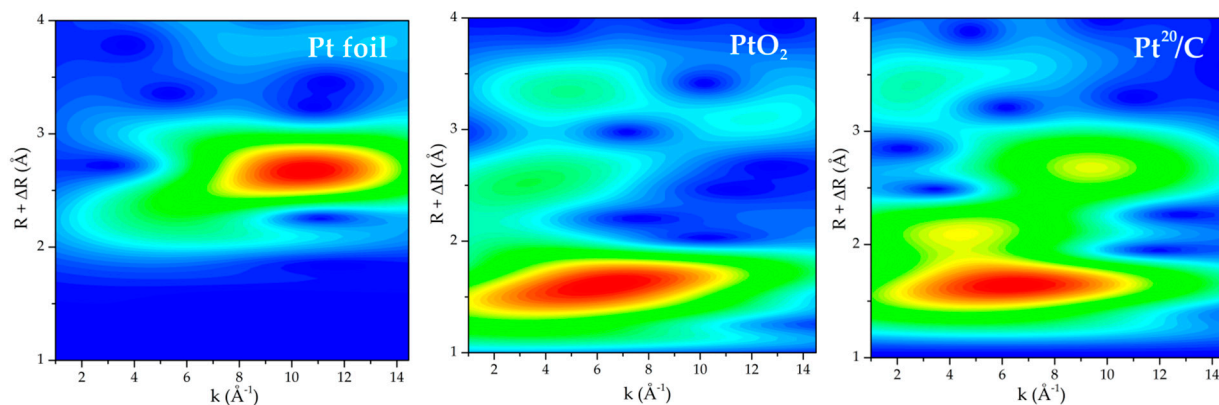

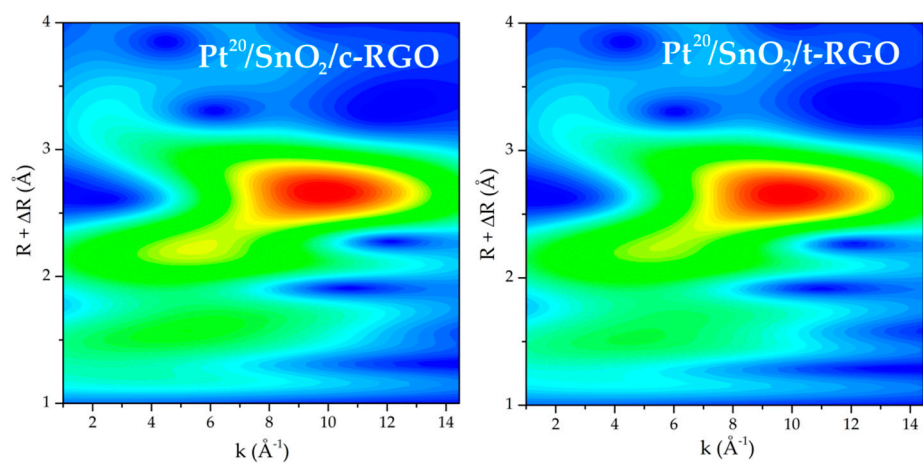

**Figure S2.** Wavelet transform of Pt L<sub>3</sub>-edge EXAFS for Pt foil, PtO<sub>2</sub>, Pt<sup>20</sup>/C, Pt<sup>20</sup>/SnO<sub>2</sub><sup>10</sup>/c-RGO and Pt<sup>20</sup>/SnO<sub>2</sub><sup>10</sup>/t-RGO.

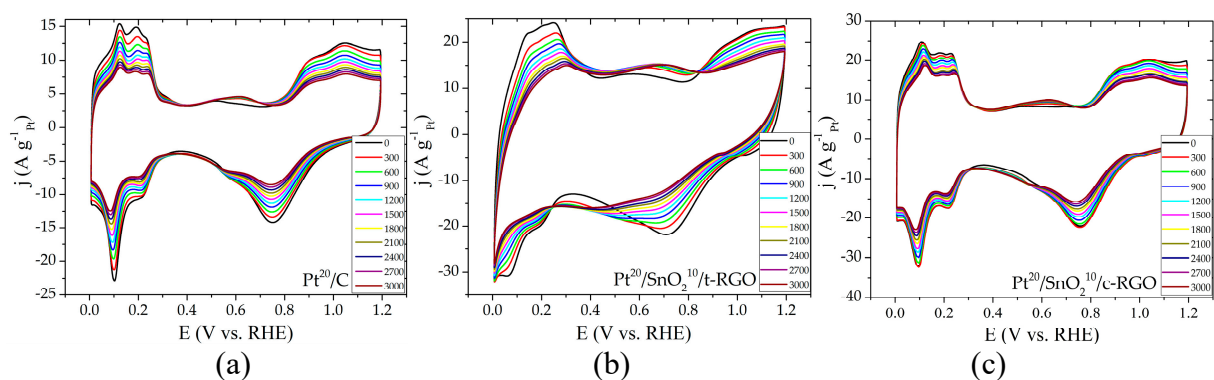

**Figure S3.** Changing CVs during AST samples Pt<sup>20</sup>/C (a), Pt<sup>20</sup>/SnO<sub>2</sub><sup>10</sup>/t-RGO (b) and Pt<sup>20</sup>/SnO<sub>2</sub><sup>10</sup>/c-RGO (c).
